# Supplementary material for: Exploring the effect of substituent in the hydrazone ligand of a family of μ-oxidodivanadium(v) hydrazone complexes on structure, DNA binding and anticancer activity
Source: Royal Society of Chemistry journal article supplement (doi:10.1039/c7dt03585c), 2017-01-01
Supplement: c7dt03585c1.pdf [file c7dt03585c1.pdf]

**DT-ART-09-2017-003585 (Revised)**

**Exploring the role of substituent in the hydrazone ligand of a family of  $\mu$ -oxidodivanadium(V) hydrazone complexes on structure, DNA binding and anticancer activity**

Debashis Patra,<sup>a</sup> Shubhabrata Paul,<sup>b</sup> Indira Majumder,<sup>b</sup> Nayim Sepay,<sup>c</sup> Sachinath Bera,<sup>d</sup> Rita Kundu,<sup>b</sup> Michael G. B. Drew,<sup>e</sup> and Tapas Ghosh\*,<sup>a</sup>

**Electronic Supporting Information (ESI)**

|                                                                                                                                                                                                                                                                        |                                                                                                                                                |                                                                                                                                  |
|------------------------------------------------------------------------------------------------------------------------------------------------------------------------------------------------------------------------------------------------------------------------|------------------------------------------------------------------------------------------------------------------------------------------------|----------------------------------------------------------------------------------------------------------------------------------|
| 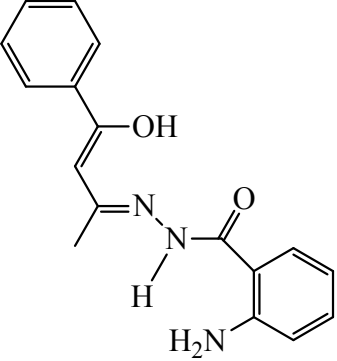 <p>H<sub>2</sub>baah [Ref. 11(a)]</p>                                                                                                                                                |  <p>H<sub>2</sub>naphpc [Ref. 11(b)]</p>                      |  <p>H<sub>3</sub>acsh [Ref. 11(c)]</p>        |
|  <p>H<sub>2</sub>acnb [Ref. 11(d)]</p>                                                                                                                                                |  <p>R = Me MeHapbh<br/>R = Cl ClHapbh</p> <p>[Ref. 11(e)]</p> |  <p>H<sub>2</sub>hapah [Ref. 11(f)]</p>       |
|  <p>R = H, R' = H H<sub>2</sub>bhsH<br/>R = H, R' = OMe H<sub>2</sub>ahsH<br/>R = OMe, R' = H H<sub>2</sub>bhsOMe<br/>R = OMe, R' = OMe H<sub>2</sub>ahsOMe</p> <p>[Ref. 11(g)]</p> |  <p>H<sub>2</sub>salbh [Ref. 11(h)]</p>                     |  <p>H<sub>2</sub>babh [Ref. 11(i)]</p>      |
|  <p>H<sub>2</sub>salamp [Ref. 12(a)]</p>                                                                                                                                            |  <p>H<sub>2</sub>sal-amp [Ref. 12(b)]</p>                   |  <p>H<sub>2</sub>sal-L-val [Ref. 13(a)]</p> |

|                                                                                                                              |                                                                                                                                   |                                                                                                                                                                                                                                                                                                                                                                                                                                  |
|------------------------------------------------------------------------------------------------------------------------------|-----------------------------------------------------------------------------------------------------------------------------------|----------------------------------------------------------------------------------------------------------------------------------------------------------------------------------------------------------------------------------------------------------------------------------------------------------------------------------------------------------------------------------------------------------------------------------|
| 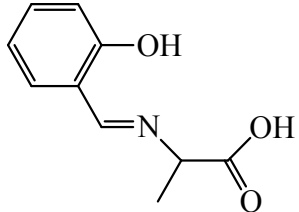 <p>H<sub>2</sub>sal-L-ala [Ref. 13(b)]</p> |  <p>H<sub>2</sub>salea [Ref. 14(a)]</p>          |  <p>H<sub>2</sub>salamhp [Ref. 14(b)]</p>                                                                                                                                                                                                                                                                                                     |
|  <p>H<sub>2</sub>dhab [Ref. 15]</p>         |  <p>Hhq [Ref. 16]</p>                            |  <p>R<sub>1</sub>, R<sub>3</sub> = -H, R<sub>2</sub>, R<sub>4</sub> = -Cl, Cl-ono-Cl<br/> R<sub>1</sub>, R<sub>3</sub> = -H, R<sub>2</sub> = tert-amyl, R<sub>4</sub> = tert-butyl tA-ono-tB<br/> R<sub>1</sub> = -H, R<sub>2</sub> = tert-amyl, R<sub>3</sub>, R<sub>4</sub> = tert-butyl tA-ono-2tB</p> <p>H<sub>2</sub>XonoY [Ref. 17]</p> |
|  <p>H<sub>2</sub>imn [Ref. 18]</p>        |  <p>H<sub>2</sub>bihyat [Ref. 19 &amp; 20]</p> |  <p>H<sub>2</sub>embh [Ref. 21]</p>                                                                                                                                                                                                                                                                                                         |

**Scheme S1.** The structure of the ligands present in the complexes mentioned in Table 4.

Table S1 Different type of interactions between the CT-DNA and HPV 18 DNA with the complexes obtained from molecular docking study.

| Complex    | VdW + H<br>bond +<br>dissolving<br>energy | Electr<br>ostatic<br>energy | Total<br>(1) | Final total<br>internal energy<br>(kcal mol <sup>-1</sup> )<br>(2) | Torsional<br>free energy<br>(kcal mol <sup>-1</sup> )<br>(3) | Unbound<br>system's<br>energy<br>(4) | Estimated<br>free<br>energy of<br>binding<br>[(1) + (2) +<br>(3) - (4)]<br>(kcal mol <sup>-1</sup> ) |
|------------|-------------------------------------------|-----------------------------|--------------|--------------------------------------------------------------------|--------------------------------------------------------------|--------------------------------------|------------------------------------------------------------------------------------------------------|
| CT DNA     |                                           |                             |              |                                                                    |                                                              |                                      |                                                                                                      |
| <b>1</b>   | -8.53                                     | -0.53                       | -9.06        | -3.04                                                              | 1.79                                                         | -3.04                                | -7.27                                                                                                |
| <b>2</b>   | -10.87                                    | -0.11                       | -10.98       | -2.60                                                              | 2.39                                                         | -2.60                                | -8.59                                                                                                |
| HPV 18 DNA |                                           |                             |              |                                                                    |                                                              |                                      |                                                                                                      |
| <b>1</b>   | -9.64                                     | 0.02                        | -9.62        | -3.47                                                              | 1.79                                                         | -3.47                                | -7.82                                                                                                |
| <b>2</b>   | -10.74                                    | -0.09                       | -10.83       | -3.52                                                              | 2.39                                                         | -3.52                                | -8.44                                                                                                |

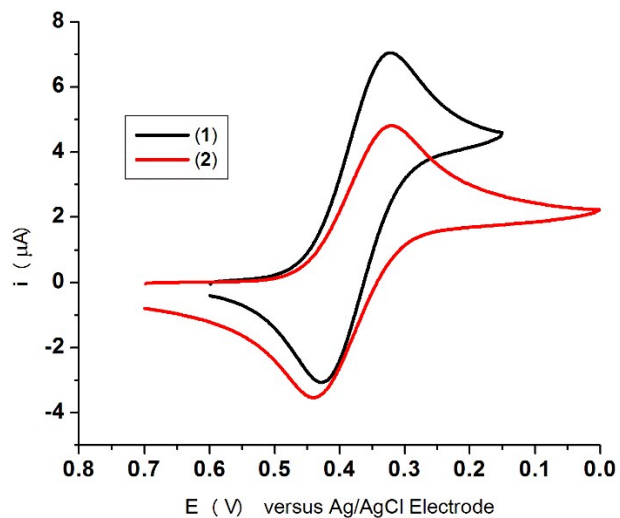

**Fig. S1.** Cyclic voltammogram of the complexes **1** and **2** in  $\text{CH}_2\text{Cl}_2$  solution.

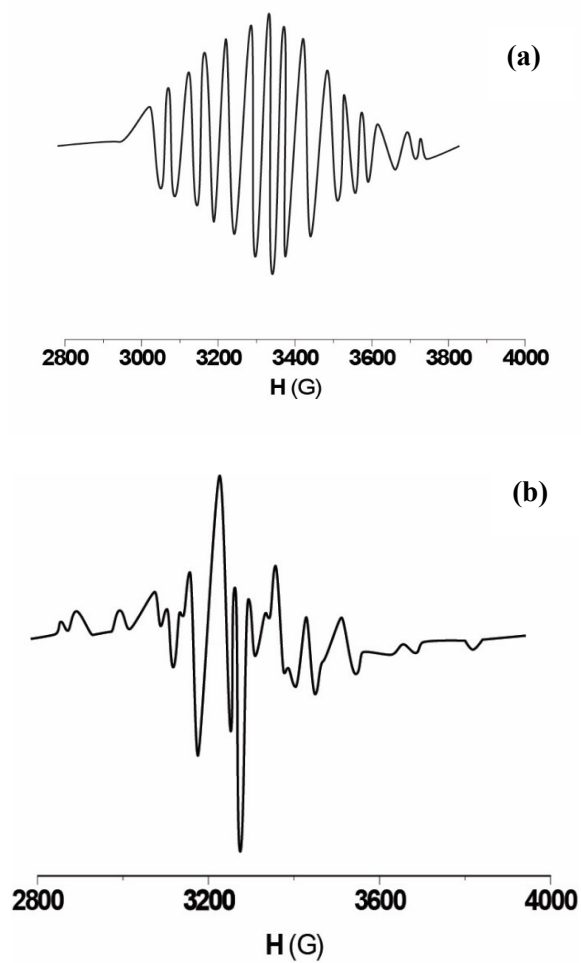

**Fig. S2.** X-band EPR spectra of complex **1A** in  $\text{CH}_2\text{Cl}_2$  solution (a) at 300 K and (b) at 77 K.

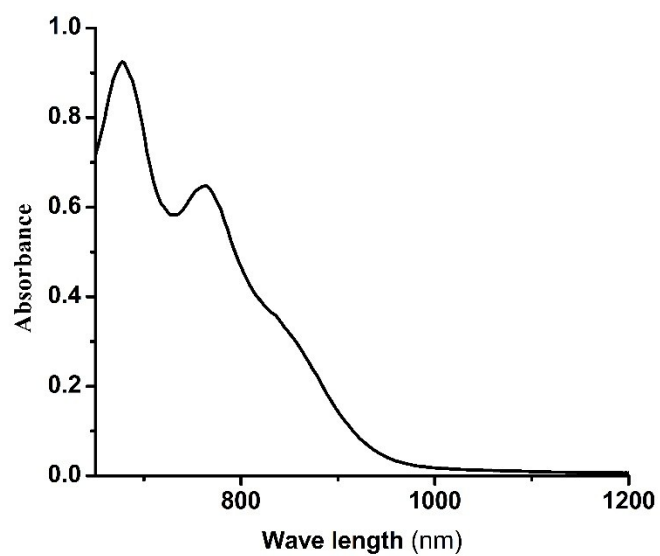

Fig. S3. Electronic spectra of 2A in CH<sub>2</sub>Cl<sub>2</sub> solution.

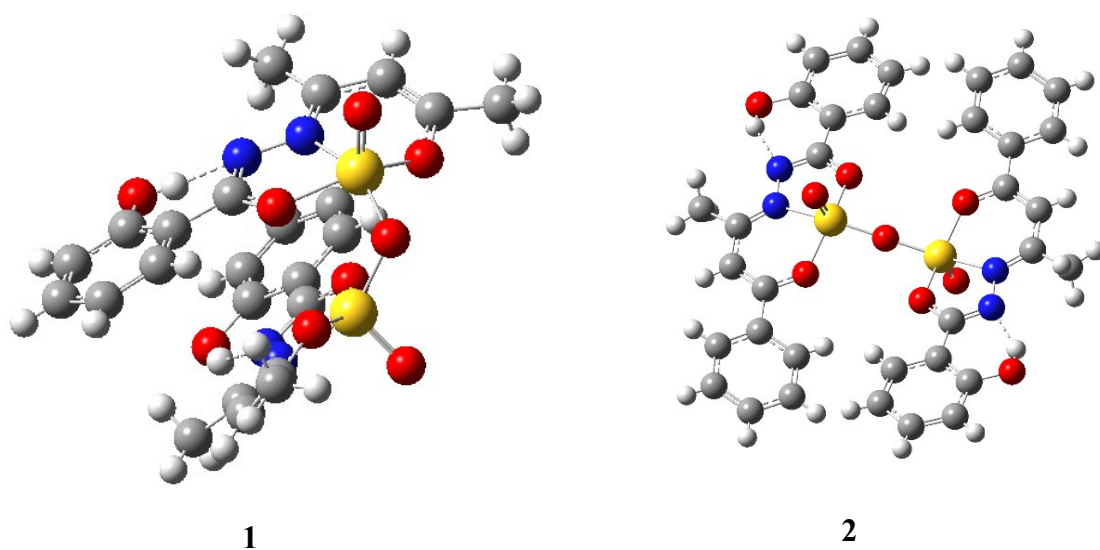

Fig. S4. DFT optimized structure of 1 and 2.

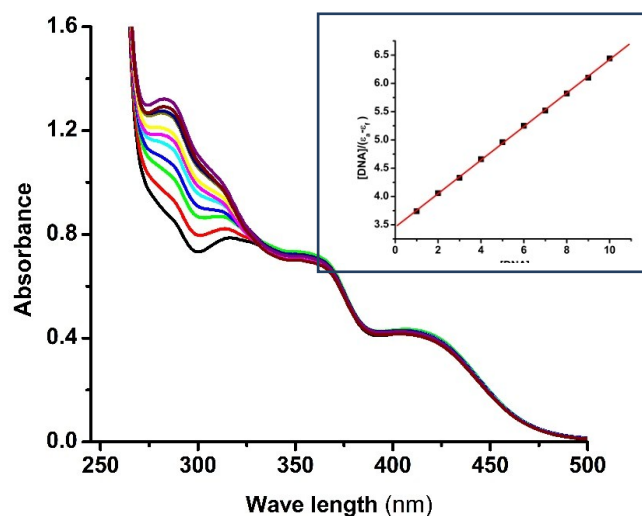

**Fig. S5.** Absorption spectra of the complex **2** in the presence of increasing amounts of CT DNA. A fixed concentration of complex ( $1.0 \times 10^{-5}$  M) was treated with increasing amounts of DNA over a range of  $(1-10) \times 10^{-6}$  M. (**inset:** The linear fit of  $[DNA]/(\epsilon_a - \epsilon_f)$  versus  $[DNA]$ ).

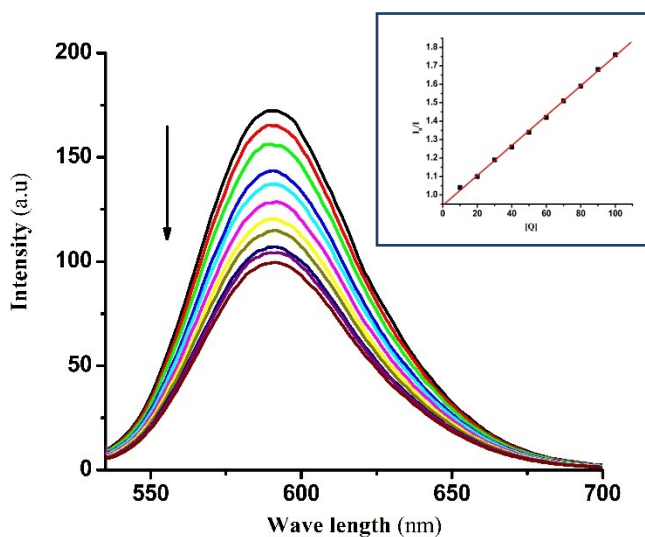

**Fig. S6.** Fluorescence spectra of (1st) EB +  $10^{-4}$  M DNA control and (2nd)-(11th) EB + DNA +  $(1-10) \times 10^{-5}$  M of complex **2**. The arrow shows that the intensity decreases with the increasing concentration of complex **2**. [**Inset:** Stern-Volmer plot for the quenching of fluorescence of the ethidium bromide (EB) DNA complex caused by complex **2**].

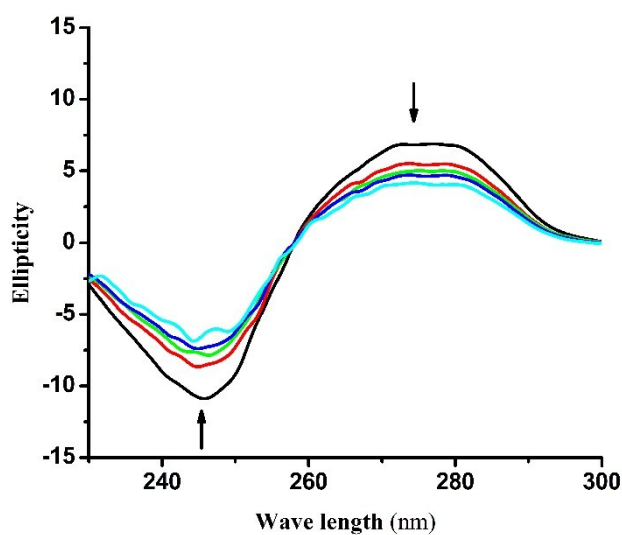

**Fig. S7** Circular dichroism spectra of 60  $\mu\text{M}$  CT-DNA in 10 mM Tris-HCl buffer (pH 7.2) titrated with of 10-40  $\mu\text{M}$  complex **2**. The scan rate of 50 nm/min was maintained and cuvette with 1 mm path length was used.

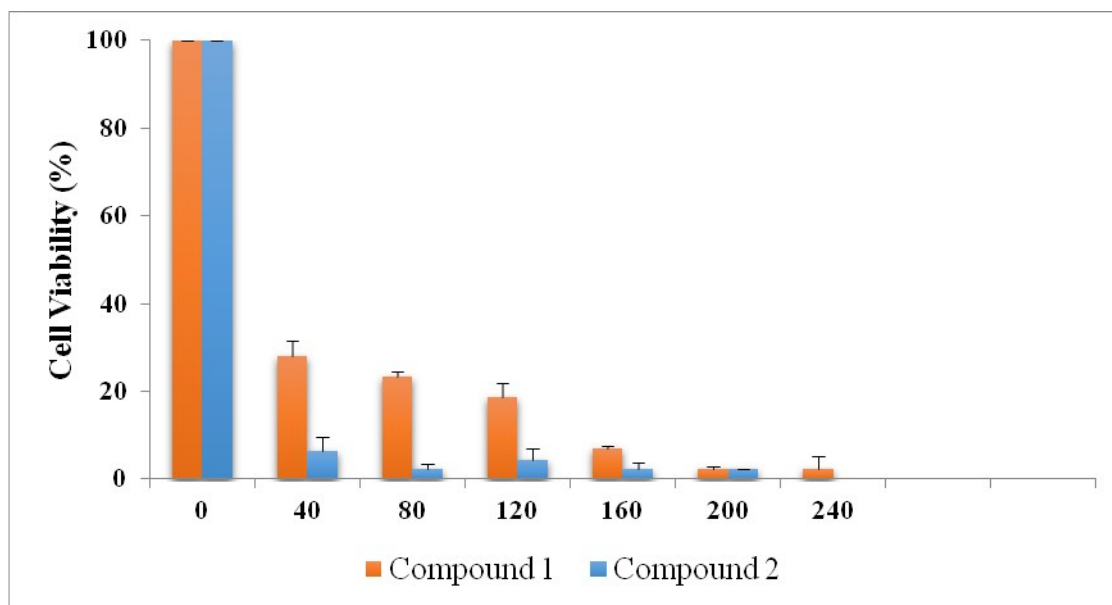

**Fig. S8** MTT assay showing cell viability of SiHa cells treated with complexes **1** and **2** (concentration range: 40-240  $\mu\text{M}$ ), bars represent SD of three independent replicates.



Bright field image

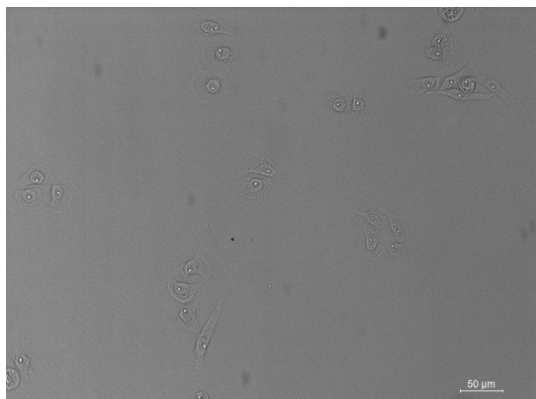

Control (a)

Blue florescence image

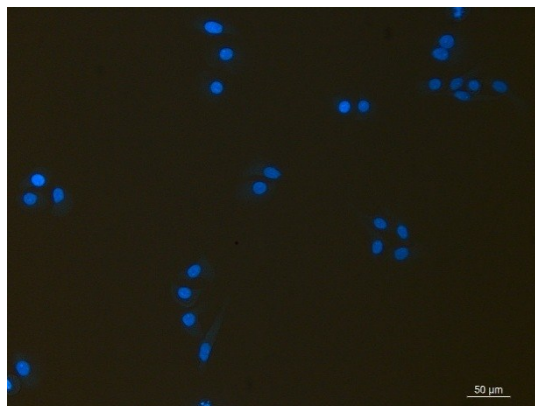

Control (b)

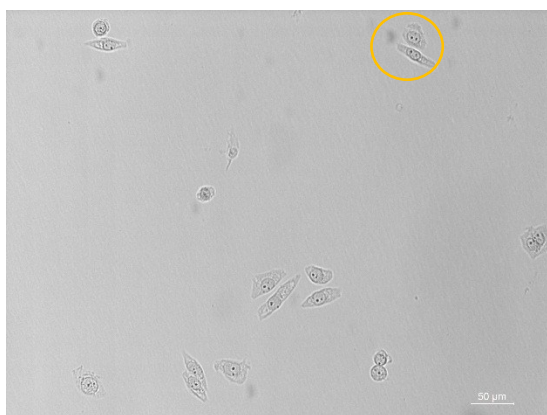

Complex 1 (a)

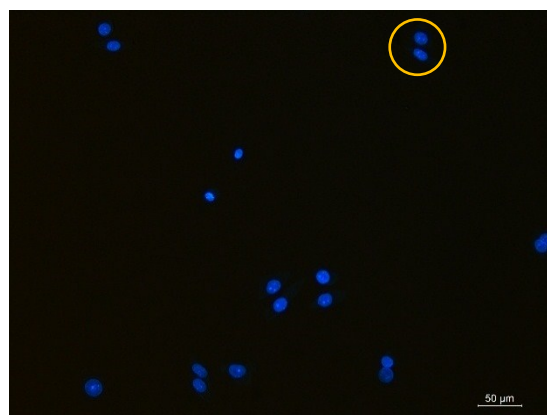

Complex 1 (b)

**Fig. S9.** Study of apoptosis by morphological changes in nuclei of SiHa cells. Marked circle showing the morphological changes in nuclei of SiHa cells observed on applying complex 1 in comparison to control.

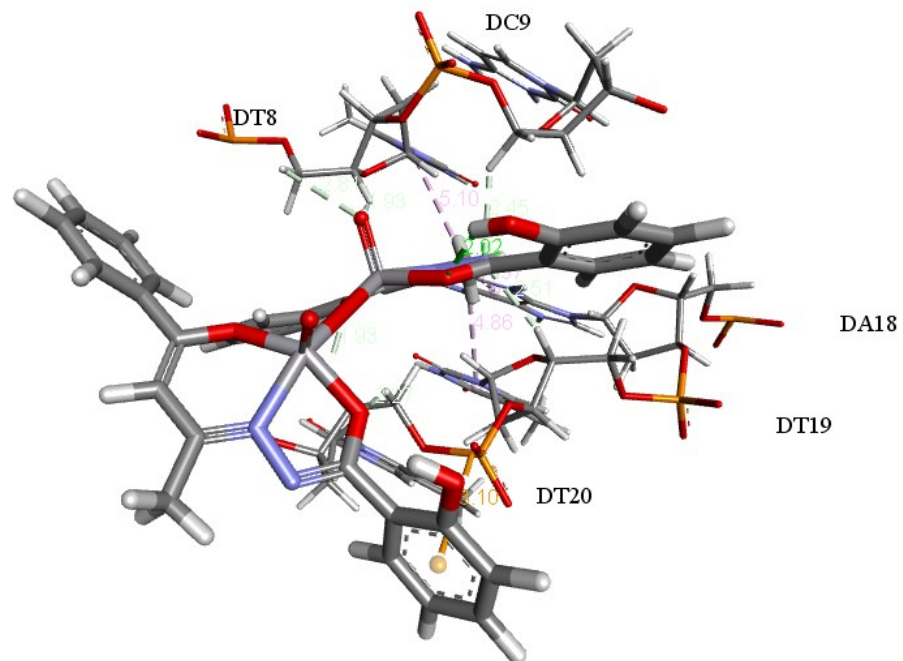

**Fig. S10.** Docked pose of complex **2** showing interaction with CT DNA base pairs.

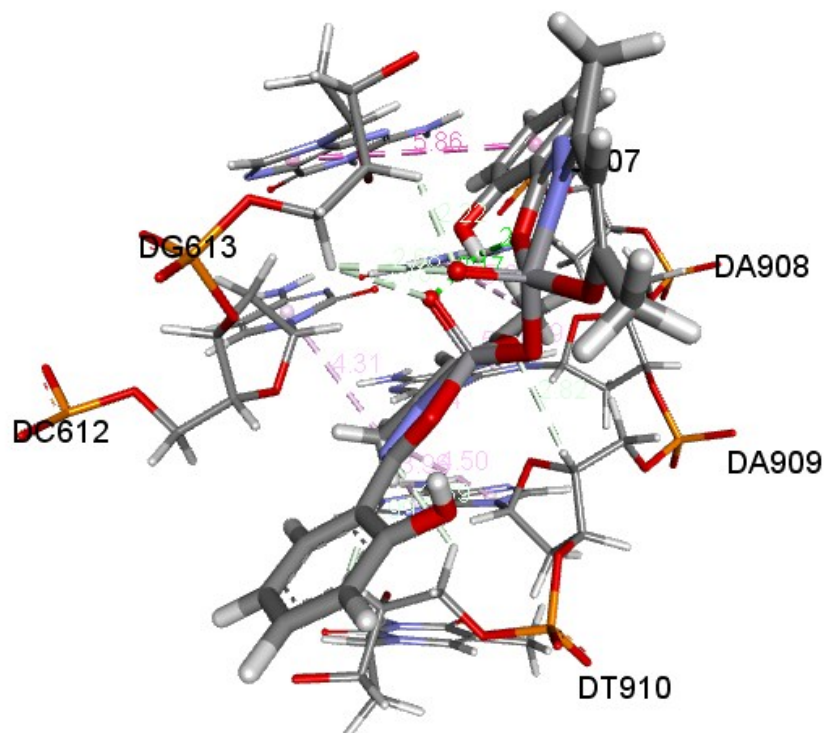

**Fig. S11.** Docked pose of complex **1** showing interaction with HPV 18 DNA base pairs.
